# Supplementary material for: Effect of Curcumin on Diabetic Kidney Disease: A Systematic Review and Meta-Analysis of Randomized, Double-Blind, Placebo-Controlled Clinical Trials
Source: Evid Based Complement Alternat Med. 2021 Dec 2;2021:6109406. doi: 10.1155/2021/6109406 (PMC8660194; doi:10.1155/2021/6109406)
Supplement: Supplementary Materials — Table S1: PRISMA 2020 Checklist. Table S2: search strategies of the database. Table S3: Begg's test and Egger's test of curcumin supplementation on outcomes. [file 6109406.f1.doc]

Effect of Curcumin on Diabetic Kidney Disease: A systematic review and meta-analysis of randomized, double-blind, placebo-controlled clinical trials

Zhao Jie, Mo Chao, Ai Jun, Shi Wei, Meng LiFeng

Supplementary appendix to the manuscript

Contents of supplementary appendix

[Supplementary Table S1 1](#__RefHeading___Toc81782701)

[PRISMA 2020 Checklist 1](#__RefHeading___Toc81782702)

[Supplementary Table S2 5](#__RefHeading___Toc81782703)

[Search strategies of database 5](#__RefHeading___Toc81782704)

[Supplementary Table S3 10](#__RefHeading___Toc81782705)

[Begg’s test and Egger’s test of curcumin supplementation on outcomes 10](#__RefHeading___Toc81782706)

# Supplementary Table S1

## PRISMA 2020 Checklist

| **Section and Topic** | **Item #** | **Checklist item** | **Location where item is reported** |
| --- | --- | --- | --- |
| **TITLE** | | |  |
| Title | 1 | Identify the report as a systematic review. | 1 |
| **ABSTRACT** | | |  |
| Abstract | 2 | See the PRISMA 2020 for Abstracts checklist. | 2 |
| **INTRODUCTION** | | |  |
| Rationale | 3 | Describe the rationale for the review in the context of existing knowledge. | 3-4 |
| Objectives | 4 | Provide an explicit statement of the objective(s) or question(s) the review addresses. | 4 |
| **METHODS** | | |  |
| Eligibility criteria | 5 | Specify the inclusion and exclusion criteria for the review and how studies were grouped for the syntheses. | 5 |
| Information sources | 6 | Specify all databases, registers, websites, organisations, reference lists and other sources searched or consulted to identify studies. Specify the date when each source was last searched or consulted. | 4-5 |
| Search strategy | 7 | Present the full search strategies for all databases, registers and websites, including any filters and limits used. | 4-5 and Supplementary Table S2 |
| Selection process | 8 | Specify the methods used to decide whether a study met the inclusion criteria of the review, including how many reviewers screened each record and each report retrieved, whether they worked independently, and if applicable, details of automation tools used in the process. | 5-6 |
| Data collection process | 9 | Specify the methods used to collect data from reports, including how many reviewers collected data from each report, whether they worked independently, any processes for obtaining or confirming data from study investigators, and if applicable, details of automation tools used in the process. | 5-6 |
| Data items | 10a | List and define all outcomes for which data were sought. Specify whether all results that were compatible with each outcome domain in each study were sought (e.g. for all measures, time points, analyses), and if not, the methods used to decide which results to collect. | 5-6 |
| 10b | List and define all other variables for which data were sought (e.g. participant and intervention characteristics, funding sources). Describe any assumptions made about any missing or unclear information. | 5-6 |
| Study risk of bias assessment | 11 | Specify the methods used to assess risk of bias in the included studies, including details of the tool(s) used, how many reviewers assessed each study and whether they worked independently, and if applicable, details of automation tools used in the process. | 6 |
| Effect measures | 12 | Specify for each outcome the effect measure(s) (e.g. risk ratio, mean difference) used in the synthesis or presentation of results. | 6-7 |
| Synthesis methods | 13a | Describe the processes used to decide which studies were eligible for each synthesis (e.g. tabulating the study intervention characteristics and comparing against the planned groups for each synthesis (item #5)). | 6-7 |
| 13b | Describe any methods required to prepare the data for presentation or synthesis, such as handling of missing summary statistics, or data conversions. | 6-7 |
| 13c | Describe any methods used to tabulate or visually display results of individual studies and syntheses. | 6-7 |
| 13d | Describe any methods used to synthesize results and provide a rationale for the choice(s). If meta-analysis was performed, describe the model(s), method(s) to identify the presence and extent of statistical heterogeneity, and software package(s) used. | 6-7 |
| 13e | Describe any methods used to explore possible causes of heterogeneity among study results (e.g. subgroup analysis, meta-regression). | 7 |
| 13f | Describe any sensitivity analyses conducted to assess robustness of the synthesized results. | 7 |
| Reporting bias assessment | 14 | Describe any methods used to assess risk of bias due to missing results in a synthesis (arising from reporting biases). | 6 |
| Certainty assessment | 15 | Describe any methods used to assess certainty (or confidence) in the body of evidence for an outcome. | 7-8 |
| **RESULTS** | | |  |
| Study selection | 16a | Describe the results of the search and selection process, from the number of records identified in the search to the number of studies included in the review, ideally using a flow diagram. | 8 and Figure 1 |
| 16b | Cite studies that might appear to meet the inclusion criteria, but which were excluded, and explain why they were excluded. | 8 and Figure 1 |
| Study characteristics | 17 | Cite each included study and present its characteristics. | 8 |
| Risk of bias in studies | 18 | Present assessments of risk of bias for each included study. | 8-9 and Figure 2 |
| Results of individual studies | 19 | For all outcomes, present, for each study: (a) summary statistics for each group (where appropriate) and (b) an effect estimate and its precision (e.g. confidence/credible interval), ideally using structured tables or plots. | 9-12, and  Figure 3-5 |
| Results of syntheses | 20a | For each synthesis, briefly summarise the characteristics and risk of bias among contributing studies. | 8-9 |
| 20b | Present results of all statistical syntheses conducted. If meta-analysis was done, present for each the summary estimate and its precision (e.g. confidence/credible interval) and measures of statistical heterogeneity. If comparing groups, describe the direction of the effect. | 9-12, Figure 3-5, and Table 2 |
| 20c | Present results of all investigations of possible causes of heterogeneity among study results. | 9-12, and Table 3 |
| 20d | Present results of all sensitivity analyses conducted to assess the robustness of the synthesized results. | 12 |
| Reporting biases | 21 | Present assessments of risk of bias due to missing results (arising from reporting biases) for each synthesis assessed. | 8-9 |
| Certainty of evidence | 22 | Present assessments of certainty (or confidence) in the body of evidence for each outcome assessed. | 12-13, and Table 4 |
| **DISCUSSION** | | |  |
| Discussion | 23a | Provide a general interpretation of the results in the context of other evidence. | 13-15 |
| 23b | Discuss any limitations of the evidence included in the review. | 15-16 |
| 23c | Discuss any limitations of the review processes used. | 15-16 |
| 23d | Discuss implications of the results for practice, policy, and future research. | 16 |
| **OTHER INFORMATION** | | |  |
| registration and protocol | 24a | Provide registration information for the review, including register name and registration number, or state that the review was not registered. | 4 |
| 24b | Indicate where the review protocol can be accessed, or state that a protocol was not prepared. | 4 |
| 24c | Describe and explain any amendments to information provided at registration or in the protocol. | - |
| Support | 25 | Describe sources of financial or non-financial support for the review, and the role of the funders or sponsors in the review. | 18 |
| Competing interests | 26 | Declare any competing interests of review authors. | 18 |
| Availability of data, code and other materials | 27 | Report which of the following are publicly available and where they can be found: template data collection forms; data extracted from included studies; data used for all analyses; analytic code; any other materials used in the review. | 18 |

# Supplementary Table S2

## Search strategies of database

| 1. PubMed |
| --- |
| #1 "Diabetes Mellitus"[Mesh Terms]  #2 "Diabetes Mellitus, Type 2"[Mesh]  #3 "Diabetes Mellitus, Type 1"[Mesh]  #4 #1 OR #2 OR #3  #5 "Glomerular Filtration Rate"[MeSH Terms]  #6 "Proteinuria"[MeSH Terms]  #7 "Albuminuria" [MeSH Terms]  #8 "Kidney Diseases" [MeSH Terms]  #9 albumin excretion rate[Title/Abstract]  #10 albumin creatinine ratio[Title/Abstract]  #11 albumin to creatinine ratio[Title/Abstract]  #12 microalbuminuria[Title/Abstract]  #13 macroalbuminuria[Title/Abstract]  #14 creatinine clearance rate[Title/Abstract]  #15 serum creatinine[Title/Abstract]  #16 #5 OR #6 OR #7 OR #8 OR #9 OR #10 OR #11 OR #12 OR #13 OR #14 OR #15  #17 DiabeticNephropathies"[MeSH Terms]  #18 Diabetic Nephropathy[Title/Abstract]  #19 Nephropathy, Diabetic[Title/Abstract]  #20 Diabetic Kidney Disease*[Title/Abstract]  #21 Kidney Disease, Diabetic[Title/Abstract]  #22 Diabetic Glomerulosclerosis[Title/Abstract]  #23 #17 OR #18 OR #19 OR #20 OR #21 OR #22  #24 "Curcuma"[Mesh Terms]  #25 "Curcumin"[Mesh Terms]  #26 Curcuma longa[Title/Abstract]  #27 longa, Curcuma[Title/Abstract]  #28 Tumeric[Title/Abstract]  #29 Turmeric Yellow[Title/Abstract]  #30 Yellow, Turmeric[Title/Abstract]  #31 Curcumas[Title/Abstract]  #32 Curcuma zedoaria*[Title/Abstract]  #33 zedoaria, Curcuma[Title/Abstract]  #34 #24 OR #25 OR #26 OR #27 OR #28 OR #29 OR #30 OR #31 OR #32 OR #33  #35 randomized controlled trial [Publication Type]  #36 controlled clinical trial [Publication Type]  #37 clinical trials [Title/Abstract]  #38 random* [Title/Abstract]  #39 trial [Title/Abstract]  #40 #35 OR #36 OR #37 OR #38 OR #39  #41 ((#4 AND #16) OR #23) AND #34 AND #40 |
| 2. Cochrane Library |
| #1 MeSH descriptor: [Diabetes Mellitus] explode all trees  #2 MeSH descriptor: [Glomerular Filtration Rate] explode all trees  #3 MeSH descriptor: [Kidney Diseases] explode all trees  #4 MeSH descriptor: [Albuminuria] explode all trees  #5 MeSH descriptor: [Proteinuria] explode all trees  # 6 urinary albumin excretion rate: ti,ab,kw  #7 albumin excretion rate: ti,ab,kw  #8 albumin creatinine ratio: ti,ab,kw  #9 albumin to creatinine ratio: ti,ab,kw  #10 microalbuminuria: ti,ab,kw  #11 macroalbuminuria: ti,ab,kw  #12 creatinine clearance rate: ti,ab,kw  #13 serum creatinine: ti,ab,kw  #14 #1 AND (#2 OR #3 OR #4 OR #5 OR #6 OR #7 OR #8 OR #9 OR #10 OR #11 OR #12 OR #13)  #15 MeSH descriptor: [Diabetic Nephropathies] explode all trees  #16 Diabetic Nephropathies: ti,ab,kw  #17 Diabetic Nephropathy: ti,ab,kw  #18 Nephropathy, Diabetic: ti,ab,kw  #19 Diabetic Kidney Disease*: ti,ab,kw  #20 Kidney Disease, Diabetic: ti,ab,kw  #21 Diabetic Glomerulosclerosis: ti,ab,kw  #22 #15 OR #16 OR #17 OR #18 OR #19 OR #20 OR #21  #23 MeSH descriptor: [Curcumin] explode all trees  #24 MeSH descriptor: [Curcuma] explode all trees  #25 Curcumin: ti,ab,kw  #26 Curcuma*: ti,ab,kw  #27 Tumeric*: ti,ab,kw  #28 zedoaria, Curcuma: ti,ab,kw  #29 Curcuma longa*: ti,ab,kw  #30 longa, Curcuma: ti,ab,kw  #31 #23 OR #24 OR #25 OR #26 OR #27 OR #28 OR #29 OR #30  #32 randomized controlled trial: ti,ab,kw  #33 controlled clinical trial: ti,ab,kw  #34 clinical trials OR random*: ti,ab,kw  #35 trial: ti,ab,kw  #36 #32 OR #33 OR #34 OR #35  #37 (#14 OR #22) AND #31 AND #36 |
| 3. EMBASE |
| #1 'diabetes mellitus'/exp  #2 'glomerular filtration rate'/exp  #3 'kidney diseases'/exp  #4 'albuminuria'/exp  #5 'urinary albumin excretion rate': ab,ti  #6 'albumin excretion rate': ab,ti  #7 'albumin creatinine ratio': ab,ti  #8 'albumin to creatinine ratio': ab,ti  #9 'microalbuminuria': ab,ti  #10 'macroalbuminuria': ab,ti  #11 'creatinine clearance rate': ab,ti  #12 'serum creatinine': ab,ti  #13 #1 AND (#2 OR #3 OR #4 OR #5 OR #6 OR #7 OR #8 OR #9 OR #10 OR #11 OR #12)  #14 'diabetic nephropathies'/exp  #15 'diabetic nephropathy': ab,ti  #16 'nephropathy, diabetic': ab,ti  #17 'diabetic kidney disease': ab,ti  #18 'kidney disease, diabetic': ab,ti  #19 'diabetic glomerulosclerosis': ab,ti  #20 #14 OR #15 OR #16 OR #17 OR #18 OR #19  #21 'curcumin'/exp  #22 'curcuma'/exp  #23 curcumin: ab,ti  #24 'curcuma longa': ab,ti  #25 'zedoaria, curcuma': ab,ti  #26 'longa, curcuma': ab,ti  #27 tumeric: ab,ti  #28 #21 OR #22 OR #23 OR #24 OR #25 OR #26 OR #27  #29 'randomized controlled trial':ab,ti  #30 'controlled clinical trial':ab,ti  #31 'clinical trials':ab,ti  #32 random:ab,ti  #33 trial:ab,ti  #34 #29 OR #30 OR #31 OR #32 OR #33  #35 (#13 OR #20) AND #28 AND #34 |
| 4. Web of Science |
| #1 TS= (Diabetes Mellitus OR Diabetes Mellitus, Type 2 OR Diabetes Mellitus, Type 1) AND (Glomerular Filtration Rate OR Proteinuria OR Albuminuria OR Kidney Diseases OR urinary albumin excretion rate OR albumin excretion rate OR albumin creatinine ratio OR albumin to creatinine ratio OR microalbuminuria OR macroalbuminuria OR creatinine clearance rate OR serum creatinine)  #2 TS= (Diabetic Nephropathies OR Diabetic Nephropathy OR Nephropathy, Diabetic OR Diabetic Kidney Disease* OR Kidney Disease, Diabetic OR Diabetic Glomerulosclerosis)  #3 TS= (Curcuma ORCurcumin OR Turmeric Yellow OR Yellow, Turmeric OR Diferuloylmethane OR Curcuma zedoaria* OR zedoaria, Curcuma OR Curcuma longa OR longa, Curcuma OR Tumeric OR Turmeric)  #4 TS= (randomized controlled trial OR controlled clinical trial OR clinical trials OR random* OR trial)  #5 (#1 OR #2) AND #3 AND #4 |
| 5. Scopus |
| #1 ("Diabetes Mellitus" AND ("Glomerular Filtration Rate" OR "Proteinuria" OR "Albuminuria" OR "Kidney Diseases" OR "urinary albumin excretion rate" OR "albumin excretion rate" OR "albumin creatinine ratio" OR "albumin to creatinine ratio" OR "microalbuminuria" OR "macroalbuminuria" OR "creatinine clearance rate" OR "serum creatinine")): TITLE-ABS-KEY  #2 ("Diabetic Nephropathies" OR "Diabetic Nephropathy" OR "Nephropathy, Diabetic" OR "Diabetic Kidney Disease*" OR "Kidney Disease, Diabetic" OR "Diabetic Glomerulosclerosis"): TITLE-ABS-KEY  #3 (curcuma OR curcumin OR "Turmeric Yellow" OR "Yellow, Turmeric" OR "Curcuma zedoaria*" OR "zedoaria, Curcuma" OR "Curcuma longa" OR "longa, Curcuma" OR tumeric OR turmeric): TITLE-ABS-KEY  #4 ("randomized controlled trial" OR "controlled clinical trial" OR "clinical trials" OR random* OR trial): TITLE-ABS-KEY  #5 (#1 OR #2) AND #3 AND #4 |

# Supplementary Table S3

## Begg’s test and Egger’s test of curcumin supplementation on outcomes

| Outcomes | | Publication bias | |
| --- | --- | --- | --- |
| Begg’s test (*P Value*) | Egger’s test (*P Value*) |
| Renal function | SCr | 1 | 0.792 |
| BUN | 1 | - |
| PRO | 1 | 0.755 |
| Lipid profile | TC | 0.734 | 0.636 |
| TG | 0.734 | 0.647 |
| HDL | 0.296 | 0.212 |
| LDL | 1 | 0.905 |
| Blood pressure | SBP | 0.734 | 0.494 |
| DBP | 0.734 | 0.139 |
| Glycemic control | FBG | 0.308 | 0.553 |
| SCr, serum creatinine; BUN, blood urea nitrogen; PRO, proteinuria; TC, total cholesterol; TG, triglycerides; LDL, low-density lipoprotein; HDL, high-density lipoprotein; SBP; systolic blood pressure; DBP, diastolic blood pressure; FBG, fasting blood glucose. | | | |
